# Supplementary material
Source: PubMed Central journal article supplement (PMC3731912)
Supplement: CJN.11091012_CJN11091012SupplementaryData.pdf [file CJN.11091012_CJN11091012SupplementaryData.pdf]

**Supplementary Table S1, Characteristics of selected single nucleotide polymorphisms**

| SNP characteristics                      |                               |                                                    |                                    |                         | Study characteristics                    |                                         |                                                                                            |                                                                                                                                        |
|------------------------------------------|-------------------------------|----------------------------------------------------|------------------------------------|-------------------------|------------------------------------------|-----------------------------------------|--------------------------------------------------------------------------------------------|----------------------------------------------------------------------------------------------------------------------------------------|
| Functional group                         | Gene                          | Name                                               | SNP                                | MAF                     | Endpoint                                 | Sample size (% cases)                   | Effect                                                                                     | Ref                                                                                                                                    |
| Endothelial function/vascular remodeling | MMP1                          | Matrix metalloproteinase 1                         | rs11292517 (-1607 1G/2G)           | ?                       | AVF failure                              | 596 (29%)                               | HR 2,32 for 1G/1G vs. 1G/2G or 2G/2G genotypes                                             | (1)                                                                                                                                    |
|                                          | NO3                           | Nitric oxide synthase 3                            | rs1799983                          | 0,34                    | Coronary restenosis                      | 901 (10%)                               | HR 1.67 (95% CI 1.09-2.54) p=0,018                                                         | (2)                                                                                                                                    |
|                                          | ELN                           | Elastin                                            | rs2071307                          | 0,37                    | Enzyme function                          | 800 (NA)                                | SNP resulted in altered (decreased) enzyme function                                        | (3)                                                                                                                                    |
|                                          | ANXA5                         | Annexin A5                                         | rs4833229                          | 0,43                    | Coronary restenosis                      | 3104 (9,8%)                             | OR=1.294, P=0.011                                                                          | (4)                                                                                                                                    |
|                                          | ANXA5                         | Annexin A5                                         | rs6830321                          | 0,48                    | Coronary restenosis                      | 3104 (9,8%)                             | OR=1.347, p=0.003                                                                          | (4)                                                                                                                                    |
|                                          | LRP1                          | low density lipoprotein receptor-related protein 1 | rs1466535                          | 0,33                    | Abdominal aortic aneurysm                | 55410 (11%)                             | OR 1.15 (1.10-1.21), p=4.52E-10                                                            | (5)                                                                                                                                    |
|                                          | QKI                           | Quaking                                            | RS2759393 (34084C>A)               | 0,23                    | Coronary restenosis                      | 3104 (9,8%)                             | HR 0.68 (0.52-0.88), P=0.0041                                                              | (6)                                                                                                                                    |
|                                          | QKI                           | Quaking                                            | RS3763197 (2786A>G)                | 0,15                    | Coronary restenosis                      | 3104 (9,8%)                             | HR 2.11 (1.23-3.62), P=0.007                                                               | (6)                                                                                                                                    |
|                                          | QKI                           | Quaking                                            | RS3857504 (-2616C>T)               | 0,43                    | Coronary restenosis                      | 3104 (9,8%)                             | HR 1.88 (1.10-3.24), P=0.022                                                               | (6)                                                                                                                                    |
|                                          | -                             | 12q23.2                                            | rs10861032 (T>C)                   |                         | Coronary restenosis                      | 866 (34,1%)                             | OR 1.75 (1.35-2.27), Pcombined=1.11E-07                                                    | (6)                                                                                                                                    |
| -                                        | 12q23.2                       | rs9804922 (C>T)                                    |                                    | Coronary restenosis     | 866 (34,1%)                              | OR 2.48 (1.72-3.60), Pcombined=1.45E-06 | (6)                                                                                        |                                                                                                                                        |
| Growth factors                           | CDKN1B (p27 <sup>Kip1</sup> ) | Cyclin-dependent kinase inhibitor 1B               | rs36448499 (-838C>A)               | 0,45                    | Coronary restenosis (TVR)                | 685 (8,3%) (discovery)                  | HR 0.28 (95% CI 0.10-0.77), p=0,014                                                        | (7)                                                                                                                                    |
|                                          | CDKN1B (p27 <sup>Kip1</sup> ) | Cyclin-dependent kinase inhibitor 1B               | rs36448499 (-838C>A)               | 0,45                    | Coronary restenosis (TVR)                | 2009 (9,0%) (replication)               | HR 0.61 (95% CI 0.40-0.93), p-value not reported                                           | (7)                                                                                                                                    |
|                                          | CTGF                          | connective tissue growth factor                    | rs6918698 (-945G>C)                | 0,41                    | CV mortality during HD                   | 98 (12,2%)                              | OR 13 (95% CI 1.49-155), p=0.005                                                           | (8)                                                                                                                                    |
|                                          | FGFR4                         | Fibroblast Growth Factor receptor 4                | rs351855 (Gly388Arg)               | 0,29                    | CAD                                      | 1419 (48,4%)                            | OR 0.77 (95% CI 0.66-0.90), p=0.001                                                        | (9)                                                                                                                                    |
|                                          | KLF5                          | Kruppel-like factor 5                              | rs3812852 (-1282A>G)               | 0,08                    | hypertension                             | 472 (83,7%) (discovery)                 | OR 6,7 (95% 1,9-22,6) p=0.001                                                              | (10)                                                                                                                                   |
|                                          | KLF5                          | Kruppel-like factor 5                              | rs3812852 (-1282A>G)               | 0,08                    | hypertension                             | 1261 (31,3%) (replication)              | OR 2,8 (95% CI 1,1-7,3), p=0,007                                                           | (10)                                                                                                                                   |
|                                          | PDGFD                         | Platelet derived growth Factor D                   | rs974819 (T>C)                     | 0,32                    | CAD                                      | 64881 (51,8%)                           | OR 1,07 (1,04-1,09) P=2,4x10 <sup>-9</sup>                                                 | (11)                                                                                                                                   |
|                                          | PDGFD                         | Platelet derived growth Factor D                   | rs974819 (T>C)                     | 0,32                    | CAD                                      | 268 (58,6%)                             | OR 1,45 (95% CI 1,02-2,08). P=0,04                                                         | (12)                                                                                                                                   |
|                                          | PDGFD                         | Platelet derived growth Factor D                   | rs496339                           | 0,12                    | Coronary restenosis                      | 866 (34,1%)                             | OR 0,60 p=0,007                                                                            | (6)                                                                                                                                    |
|                                          | TGFBR1                        | Transforming growth factor, beta receptor I        | rs1626340                          | 0,23                    | Abdominal aortic aneurysm                | 1760 (41,8%)                            | OR 1,32 (1,11-1,56), P=0,001                                                               | (13)                                                                                                                                   |
|                                          | TGFBR2                        | Transforming growth factor, beta receptor2         | rs1036095                          | 0,30                    | Abdominal aortic aneurysm                | 1760 (41,8%)                            | OR 1,32 (1,12-1,54), P=0,001                                                               | (13)                                                                                                                                   |
|                                          | TGFBR2                        | Transforming growth factor, beta receptor2         | rs4522809                          | 0,48                    | Abdominal aortic aneurysm                | 1760 (41,8%)                            | OR 1,28 (1,12-1,48), P=0,0004                                                              | (13)                                                                                                                                   |
|                                          | VEGF                          | Vascular endothelial growth factor                 | rs2010963                          | 0,40                    | Death after CABG                         | 62 (16,1%)                              | OR 6,7 (1,50-29,4), P=0,003                                                                | (14)                                                                                                                                   |
|                                          | VEGF                          | Vascular endothelial growth factor                 | rs3025039 (936C>T)                 | 0,16                    | ESRD                                     | 290 (34,8%)                             | OR 2,02 (95% CI 1,27-3,53) p=0,013                                                         | (15)                                                                                                                                   |
|                                          | VEGF                          | Vascular endothelial growth factor                 | rs699947 (-2578C>A)                | 0,43                    | Mortality during Perit.dialysis          | 135 (14,8%)                             | HR 3.04 (95% CI 1.10-8.36), P=0,036                                                        | (16)                                                                                                                                   |
|                                          | VEGF                          | Vascular endothelial growth factor                 | rs699947 (-2578C>A)                | 0,43                    | CAD                                      | 418 (18,7%)                             | OR 2,97 (95% CI 1,45-6,09), p-value not reported                                           | (17)                                                                                                                                   |
|                                          | VEGF                          | Vascular endothelial growth factor                 | rs699947 (-2578C>A)                | 0,43                    | Myocardial infarction                    | 418 (11,0%)                             | OR 7,02 (95% CI 1,93-25,6), p-value not reported                                           | (17)                                                                                                                                   |
| Inflammation                             | IL6                           | Interleukin 6                                      | rs1800795 (-174G>C)                | 0,48                    | index of coexistent disease (ICED) score | 183 (NA)                                | OR of higher comorbidity score 4,87 (95%CI 1,35-17,58), P=0,02                             | (18)                                                                                                                                   |
|                                          | IL6                           | Interleukin 6                                      | rs1800795 (-174G>C)                | 0,48                    | Karnofsky Index (functional status)      | 183 (NA)                                | OR of lower functional status 4,91 (95% CI 1,05-22,95), P=0,04                             | (18)                                                                                                                                   |
|                                          | IL10                          | Interleukin 10                                     | rs1800896 (-1082G>A)               | 0,48                    | Coronary restenosis                      | 3104 (9,8%)                             | RR 1.4 (95% CI 1.1-1.8), p-value not reported                                              | (19)                                                                                                                                   |
|                                          | IL10                          | Interleukin 10                                     | rs1800896 (-1082G>A)               | 0,48                    | CV events during HD                      | 300 (7,7%)                              | RR 2,76 (131-4,17), p=0,004                                                                | (20)                                                                                                                                   |
|                                          | IL10                          | Interleukin 10                                     | rs1800896 (-1082G>A)               | 0,48                    | mortality after acute renal failure      | 61 (42,6%)                              | HR 0,36 (95% CI 0,15-0,89), P=0,03                                                         | (21)                                                                                                                                   |
|                                          | IL10                          | Interleukin 10                                     | rs3024498 (4559A>G)                | 0,23                    | Coronary restenosis                      | 3104 (9,8%)                             | RR 2.0 (95% CI 1.4-2.8), p-value not reported                                              | (19)                                                                                                                                   |
|                                          | LTA                           | lymphotoxin alpha (TNF superfamily, member 1)      | rs1799964                          | 0,21                    | Coronary restenosis                      | 3104 (9,8%)                             | HR 0.75 (95% CI 0.57-0.98), P=0,04                                                         | (22)                                                                                                                                   |
|                                          | RP105                         | CD180                                              | rs5744478                          | 0,13                    | Coronary restenosis                      | 3104 (9,8%)                             | OR 0.59(0.39-0.9) P=0.016                                                                  | (23)                                                                                                                                   |
|                                          | TNF                           | Tumor necrosis factor alpha                        | rs361525                           | 0,05                    | Coronary restenosis                      | 3104 (9,8%)                             | HR 0.60 (95% CI 0.37-0.98), P=0,04                                                         | (22)                                                                                                                                   |
|                                          | TNF                           | Tumor necrosis factor alpha                        | rs1800629 (-308G>A)                | 0,17                    | index of coexistent disease (ICED) score | 183 (NA)                                | OR of higher comorbidity score 2,00 (95%CI 1,03-3,88), P=0,04                              | (18)                                                                                                                                   |
|                                          | TNF                           | Tumor necrosis factor alpha                        | rs1800629 (-308G>A)                | 0,17                    | Karnofsky Index (functional status)      | 183 (NA)                                | OR of lower functional status 2,16 (95% CI 1,13-4,12), P=0,02                              | (18)                                                                                                                                   |
|                                          | TNF                           | Tumor necrosis factor alpha                        | rs1800629 (-308G>A)                | 0,17                    | mortality after acute renal failure      | 61 (42,6%)                              | HR 2,47 (95% CI 1,06-5,77), P=0,04                                                         | (21)                                                                                                                                   |
|                                          | TNF                           | Tumor necrosis factor alpha                        | rs1800629 (-308G>A)                | 0,17                    | Synthetic dialysis graft failure in 1yr  | 67 (40%)                                | OR 3,5 (95% CI 1,5-8,1), P=0,003                                                           | (24)                                                                                                                                   |
|                                          | TLR4                          | Toll-like receptor 4                               | rs4986790 (Asp299Gly)              | 0,06                    | carotid artery compliance                | 2201 (NA)                               | G allele increased carotid artery compliance, beta=0,099 (95% CI 0,029-0,169), p=0,006     | (25)                                                                                                                                   |
|                                          | Calcium/phosphate metabolism  | AHSG                                               | alpha-2-HS-glycoprotein (Fetuin-A) | rs4918 (Thr256Ser(C>G)) | 0,31                                     | mortality and fetuin-A levels           | 215 (34%)                                                                                  | 256Ser carriers had lower serum Fetuin-A levels, p<0,0001, and higher all-cause and cardiovascular mortality rate, p<0,05, if inflamed |
| Klotho                                   |                               | Klotho                                             | rs9527025 (Cys>Ser)                | 0,18                    | -                                        | NA                                      | likely functional variant                                                                  | (27)                                                                                                                                   |
| Klotho                                   |                               | Klotho                                             | rs564481 (C1818T)                  | 0,36                    | LDL levels                               | 219 (NA)                                | LDL in mg/dl in CC vs T carriers: 101,8±30,9 vs 92,8±                                      | (28)                                                                                                                                   |
| Klotho                                   |                               | Klotho                                             | rs577912 (A>C)                     | 0,12                    | mortality during dialysis                | 1307 (16%)                              | HR 1,77 (1,20-2,62) p=0,004. In AA/AC subjects 16% higher Klotho mRNA expression, p=0,0045 | (29)                                                                                                                                   |
| Klotho                                   |                               | Klotho                                             | rs1207568 (-395G>A)                | 0,16                    | AVF failure                              | 126 (27%)                               | A allele carriers increased risk of AVF failure, 46% vs 20%, p=0,003                       | (30)                                                                                                                                   |
| VDR                                      |                               | Vitamin D receptor                                 | rs11574027                         | 0,05                    | Coronary restenosis                      | 866 (34,1%)                             | associated with restenosis (OR 4,2 p=0,0001)                                               | (6)                                                                                                                                    |
| VDR                                      |                               | Vitamin D receptor                                 | rs4516035                          | 0,46                    | Coronary restenosis                      | 3104 (9,8%)                             | HR 1,3 (1,1-1,5) p=0,006                                                                   | (31)                                                                                                                                   |
| VDR                                      | Vitamin D receptor            | rs2238135                                          | 0,23                               | Coronary restenosis     | 3104 (9,8%)                              | HR 0,7 (0,6-0,9) p=0,004                | (31)                                                                                       |                                                                                                                                        |

|                                      |       |                                               |                         |      |                         |             |                                           |      |
|--------------------------------------|-------|-----------------------------------------------|-------------------------|------|-------------------------|-------------|-------------------------------------------|------|
| Coagulation and platelet aggregation | FGB   | fibrinogen-beta                               | rs1800790 (-455G>A)     | 0,20 | AVF thrombosis          | 68 (49%)    | No association                            | (32) |
|                                      | FGB   | fibrinogen-beta                               | rs1800790 (-455G>A)     | 0,20 | Coronary restenosis     | 527 (5,3%)  | OR 2.7 (1.2-6.2), p=0,016                 | (33) |
|                                      | FGB   | fibrinogen-beta                               | rs1800790 (-455G>A)     | 0,20 | Coronary restenosis     | 2309 (10%)  | No association                            | (34) |
|                                      | FGB   | fibrinogen-beta                               | rs1044291               | 0,33 | Coronary restenosis     | 866 (34,1%) | OR 1,4, p=0,0028                          | (6)  |
|                                      | F5    | Factor 5                                      | rs6025 (1691G>A Leiden) | 0,02 | Dialysis graft survival | 354 (86%)   | HR 1.70 (1.32-2.19), p<0.0001             | (35) |
|                                      | F5    | Factor 5                                      | rs6025 (1691G>A Leiden) | 0,02 | AVF thrombosis          | 68 (49%)    | No association                            | (32) |
|                                      | ITGB3 | integrin, beta 3 (platelet glycoprotein IIIa) | rs5918 (L33P)           | 0,15 | AVF thrombosis          | 68 (49%)    | No association                            | (32) |
|                                      | ITGB3 | integrin, beta 3 (platelet glycoprotein IIIa) | rs5918 (L33P)           | 0,15 | Coronary thrombosis     | 139 (51%)   | OR 2,8 (1,2-6,4), p-value not reported    | (36) |
|                                      | ITGB3 | integrin, beta 3 (platelet glycoprotein IIIa) | rs5918 (L33P)           | 0,15 | Myocardial infarction   | 604 (50%)   | OR 2.11 (1.25-3.63), p-value not reported | (37) |

## References

- Lin CC, Yang WC, Chung MY, Lee PC: Functional polymorphisms in matrix metalloproteinases-1, -3, -9 are associated with arteriovenous fistula patency in hemodialysis patients *Clin J Am Soc Nephrol* 5: 1805-1814, 2010
- Pons D, Monraats PS, Zwinderman AH, de Maat MP, Doevendans PA, de Winter RJ, Tio RA, Waltenberger J, Jukema JW: Metabolic background determines the importance of NOS3 polymorphisms in restenosis after percutaneous coronary intervention: A study in patients with and without the metabolic syndrome. *Dis Markers* 26: 75-83, 2009
- He D, Miao M, Ghoryshi M, Lemaire S, Milewicz D, Keeley F, Parkinson J: Identification and characterization of polymorphism in tropoelastin and their role in late-onset cardiovascular disease [Abstract] *Canadian cardiovascular congress* 2010
- Ewing MM, Karper JC, Sampietro ML, de Vries MR, Pettersson K, Jukema JW, Quax PH: Annexin A5 prevents post-interventional accelerated atherosclerosis development in a dose-dependent fashion in mice *Atherosclerosis* 221: 333-340, 2012
- Bown MJ, Jones GT, Harrison SC, Wright BJ, Bumpstead S, Baas AF, Gretarsdottir S, Badger SA, Bradley DT, Burnand K, Child AH, Clough RE, Cockerill G, Hafez H, Scott DJ, Futers S, Johnson A, Sohrabi S, Smith A, Thompson MM, van Bockxmeer FM, Waltham M, Matthiasson SE, Thorleifsson G, Thorsteinsdottir U, Blankensteijn JD, Teijink JA, Wijmenga C, de GJ, Kiemeneij LA, Assimes TL, McPherson R, Folkersen L, Franco-Cereceda A, Palmieri J, Smith AJ, Sylvius N, Wild JB, Refstrup M, Edkins S, Gwilliam R, Hunt SE, Potter S, Lindholt JS, Frikke-Schmidt R, Tybjaerg-Hansen A, Hughes AE, Gollidge J, Norman PE, van RA, Powell JT, Eriksson P, Stefansson K, Thompson JR, Humphries SE, Sayers RD, Deloukas P, Samani NJ: Abdominal aortic aneurysm is associated with a variant in low-density lipoprotein receptor-related protein 1. *Am J Hum Genet* 89: 619-627, 2011
- Sampietro ML, Trompet S, Verschuren JJ, Talens RP, Deelen J, Heijmans BT, de Winter RJ, Tio RA, Doevendans PA, Ganesh SK, Nabel EG, Westra HJ, Franke L, van den Akker EB, Westendorp RG, Zwinderman AH, Kastrati A, Koch W, Slagboom PE, de KP, Jukema JW: A genome-wide association study identifies a region at chromosome 12 as a potential susceptibility locus for restenosis after percutaneous coronary intervention *Hum Mol Genet* 20: 4748-4757, 2011
- van Tiel CM, Bonta PI, Rittersma SZ, Beijik MA, Bradley EJ, Klous AM, Koch KT, Baas F, Jukema JW, Pons D, Sampietro ML, Pannekoek H, de Winter RJ, de Vries CJ: p27kip1-838C>A single nucleotide polymorphism is associated with restenosis risk after coronary stenting and modulates p27kip1 promoter activity. *Circulation* 120: 669-676, 2009
- Cozzolino M, Biondi ML, Banfi E, Riser BL, Mehmeti F, Cusi D, Gallieni M: CCN2 (CTGF) gene polymorphism is a novel prognostic risk factor for cardiovascular outcomes in hemodialysis patients *Blood Purif* 30: 272-276, 2010
- Ma L, Zhang H, Han C, Tong D, Zhang M, Yao Y, Luo Y, Liu X: Fibroblast growth factor receptor 4 polymorphisms and susceptibility to coronary artery disease *DNA Cell Biol* 31: 1064-1069, 2012
- Oishi Y, Manabe I, Imai Y, Hara K, Horikoshi M, Fujiu K, Tanaka T, Aizawa T, Kadowaki T, Nagai R: Regulatory polymorphism in transcription factor KLF5 at the MEF2 element alters the response to angiotensin II and is associated with human hypertension. *FASEB J* 24: 1780-1788, 2010
- Peden JF: A genome-wide association study in Europeans and South Asians identifies five new loci for coronary artery disease *Nat Genet* 43: 339-344, 2011
- Zhou J, Huang Y, Huang RS, Wang F, Xu L, Le Y, Yang X, Xu W, Huang X, Lian J, Duan S: A case-control study provides evidence of association for a common SNP rs974819 in PDGFD to coronary heart disease and suggests a sex-dependent effect *Thromb Res* 2012
- Baas AF, Medic J, van 't SR, de Kovel CG, Zernakova A, Geelkerken RH, Kranendonk SE, van Sterkenburg SM, Grobbee DE, Boll AP, Wijmenga C, Blankensteijn JD, Ruijter YM: Association of the TGF-beta receptor genes with abdominal aortic aneurysms *Eur J Hum Genet* 18: 240-244, 2010
- Pastuszczak M, Branicka A, Jakiela B, Stepień E, Jaworek AK, Wojas-Pelc A, Kapelak B, Sadowski J: The +405 GG variant of vascular endothelial growth factor polymorphism is associated with poor prognosis in patients undergoing coronary artery bypass graft surgery. *Pol Arch Med Wewn* 119: 719-725, 2009
- Doi K, Noiri E, Nakao A, Fujita T, Kobayashi S, Tokunaga K: Functional polymorphisms in the vascular endothelial growth factor gene are associated with development of end-stage renal disease in males. *Am Soc Nephrol* 17: 823-830, 2006
- Szeto CC, Chow KM, Poon P, Szeto CY, Wong TY, Li PK: Genetic polymorphism of VEGF: Impact on longitudinal change of peritoneal transport and survival of peritoneal dialysis patients *Kidney Int* 65: 1947-1955, 2004

17. Chen Y, Dawes PT, Packham JC, Matthey DL: Interaction between smoking and polymorphism in the promoter region of the VEGFA gene is associated with ischemic heart disease and myocardial infarction in rheumatoid arthritis. *Rheumatol* 38: 802-809, 2011
18. Balakrishnan VS, Guo D, Rao M, Jaber BL, Tighiouart H, Freeman RL, Huang C, King AJ, Pereira BJ: Cytokine gene polymorphisms in hemodialysis patients: association with comorbidity, functionality, and serum albumin. *Kidney Int* 65: 1449-1460, 2004
19. Monraats PS, Kurreeman FA, Pons D, Sewgobind VD, de Vries FR, Zwinderman AH, de Maat MP, Doevendans PA, de Winter RJ, Tio RA, Waltenberger J, Huizinga TW, Eefting D, Quax PH, Frants RR, Van Der Laarse A, van der Wall EE, Jukema JW: Interleukin 10: a new risk marker for the development of restenosis after percutaneous coronary intervention. *Genes Immun* 8: 44-50, 2007
20. Girndt M, Kaul H, Sester U, Ulrich C, Sester M, Georg T, Kohler H: Anti-inflammatory interleukin-10 genotype protects dialysis patients from cardiovascular events. *Kidney Int* 62: 949-955, 2002
21. Jaber BL, Rao M, Guo D, Balakrishnan VS, Perianayagam MC, Freeman RB, Pereira BJ: Cytokine gene promoter polymorphisms and mortality in acute renal failure. *Cytokine* 25: 212-219, 2004
22. Monraats PS, Pires NM, Schepers A, Agema WR, Boesten LS, de Vries MR, Zwinderman AH, de Maat MP, Doevendans PA, de Winter RJ, Tio RA, Waltenberger J, 't Hart LM, Frants RR, Quax PH, van Vlijmen BJ, Havekes LM, Van Der Laarse A, van der Wall EE, Jukema JW: Tumor necrosis factor-alpha plays an important role in restenosis development. *FASEB J* 19: 1998-2004, 2005
23. Agema WR, Monraats PS, Zwinderman AH, de Winter RJ, Tio RA, Doevendans PA, Waltenberger J, de Maat MP, Frants RR, Atsma DE, Van Der Laarse A, van der Wall EE, Jukema JW: Current PTCA practice and clinical outcomes in The Netherlands: the real world in the pre-drug-eluting stent era. *Eur Heart J* 25: 1163-1170, 2004
24. Ram S, Bass K, Abreo K, Baier RJ, Kruger TE: Tumor necrosis factor-alpha -308 gene polymorphism is associated with synthetic hemodialysis graft failure. *Investig Med* 51: 19-26, 2003
25. Hernesniemi JA, Raitakari OT, Kahonen M, Juonala M, Hutri-Kahonen N, Marniemi J, Viikari J, Lehtimäki T: Toll-like receptor 4 gene (Asp299Gly) polymorphism associates with carotid artery elasticity. The cardiovascular risk in young Finns study. *Atherosclerosis* 198: 152-159, 2008
26. Stenvinkel P, Wang K, Qureshi AR, Axelsson J, Pecoits-Filho R, Gao P, Barany P, Lindholm B, Jogestrand T, Heimbürger O, Holmes C, Schalling M, Nordfors L: Low fetuin-A levels are associated with cardiovascular death: Impact of variations in the gene encoding fetuin. *Kidney Int* 67: 2383-2392, 2005
27. dbSNP. <http://www.ncbi.nlm.nih.gov/pubmed?term=rs9527025>, accessed on 1-10-2012.
28. Shimoyama Y, Taki K, Mitsuda Y, Tsuruta Y, Hamajima N, Niwa T: KLOTHO gene polymorphisms G-395A and C1818T are associated with low-density lipoprotein cholesterol and uric acid in Japanese hemodialysis patients. *Am J Nephrol* 30: 383-388, 2009
29. Friedman DJ, Afkarian M, Tamez H, Bhan I, Isakova T, Wolf M, Ankers E, Ye J, Tonelli M, Zoccali C, Kuro-o M, Moe O, Karumanchi SA, Thadhani R: Klotho variants and chronic hemodialysis mortality. *Bone Miner Res* 24: 1847-1855, 2009
30. Kim Y, Jeong SJ, Lee HS, Kim EJ, Song YR, Kim SG, Oh JE, Lee YK, Seo JW, Yoon JW, Koo JR, Kim HJ, Noh JW, Park SH: Polymorphism in the promoter region of the klotho gene (G-395A) is associated with early dysfunction in vascular access in hemodialysis patients. *Korean J Intern Med* 23: 201-207, 2008
31. Monraats PS, Fang Y, Pons D, Pires NM, Pols HA, Zwinderman AH, de Maat MP, Doevendans PA, DeWinter RJ, Tio RA, Waltenberger J, Frants RR, Quax PH, Van Der Laarse A, van der Wall EE, Uitterlinden AG, Jukema JW: Vitamin D receptor: a new risk marker for clinical restenosis after percutaneous coronary intervention. *Expert Opin Ther Targets* 14: 243-251, 2010
32. Gungor Y, Kayatas M, Yildiz G, Ozdemir O, Candan F: The presence of PAI-1 4G/5G and ACE DD genotypes increases the risk of early-stage AVF thrombosis in hemodialysis patients. *Ren Fail* 33: 169-175, 2011
33. Oguri M, Kato K, Hibino T, Yokoi K, Segawa T, Matsuo H, Watanabe S, Nozawa Y, Murohara T, Yamada Y: Identification of a polymorphism of UCP3 associated with recurrent in-stent restenosis of coronary arteries. *Int J Mol Med* 20: 533-538, 2007
34. Monraats PS, Rana JS, Zwinderman AH, de Maat MP, Kastelein JP, Agema WR, Doevendans PA, de Winter RJ, Tio RA, Waltenberger J, Frants RR, Van Der Laarse A, van der Wall EE, Jukema JW: -455G/A polymorphism and preprocedural plasma levels of fibrinogen show no association with the risk of clinical restenosis in patients with coronary stent placement. *Thromb Haemost* 93: 564-569, 2005
35. Allon M, Zhang L, Maya ID, Bray MS, Fernandez JR: Association of factor V gene polymorphism with arteriovenous graft failure. *Am J Kidney Dis* 59: 682-688, 2012
36. Weiss EJ, Bray PF, Tayback M, Schulman SP, Kickler TS, Becker LC, Weiss JL, Gerstenblith G, Goldschmidt-Clermont PJ: A polymorphism of a platelet glycoprotein receptor as an inherited risk factor for coronary thrombosis. *N Engl J Med* 334: 1090-1094, 1996
37. Pastinen T, Perola M, Niini P, Terwilliger J, Salomaa V, Vartiainen E, Peltonen L, Syvanen A: Array-based multiplex analysis of candidate genes reveals two independent and additive genetic risk factors for myocardial infarction in the Finnish population. *Hum Mol Genet* 7: 1453-1462, 1998

**Supplementary Table S2, Quality control**

| <b>SNP</b>                       | <b>Call rate</b> | <b>MAF</b> | <b>HW p-value</b> |
|----------------------------------|------------------|------------|-------------------|
| RS4833229                        | 94,8%            | 0,43       | 0,52              |
| RS6830321                        | 95,6%            | 0,46       | 0,34              |
| RS6918698                        | 94,7%            | 0,46       | 0,11              |
| RS36228499                       | 95,1%            | 0,44       | 0,83              |
| RS10861032                       | 94,6%            | 0,18       | 0,06              |
| RS9804922                        | 94,8%            | 0,09       | 0,90              |
| RS2071307                        | 95,7%            | 0,38       | 0,65              |
| RS6025                           | 95,5%            | 0,03       | 0,22              |
| RS4918                           | 93,9%            | 0,31       | 0,64              |
| RS1044291                        | 94,7%            | 0,33       | 0,29              |
| RS1800787 (Proxy voor rs1800790) | 94,2%            | 0,21       | 0,49              |
| RS351855                         | 91,0%            | 0,32       | 0,03              |
| RS1800896                        | 94,5%            | 0,48       | 0,02              |
| RS3024498                        | 95,0%            | 0,27       | 0,14              |
| RS1800795                        | 95,7%            | 0,37       | 0,49              |
| RS17218711 (Proxy voor rs5918)   | 94,9%            | 0,15       | 0,78              |
| RS3812852                        | 95,7%            | 0,07       | 0,39              |
| RS397703 (Proxy voor 1207568)    | 95,0%            | 0,18       | 0,02              |
| RS564481                         | 93,0%            | 0,35       | 0,23              |
| RS577912                         | 94,4%            | 0,15       | 0,04              |
| RS9527025                        | 95,5%            | 0,12       | 0,77              |
| RS1466535                        | 95,7%            | 0,34       | 0,72              |
| RS1799964                        | 94,9%            | 0,23       | 0,53              |
| RS11292517                       | 93,0%            | 0,47       | 0,60              |
| RS1799983                        | 95,0%            | 0,30       | 0,94              |
| RS496339                         | 94,8%            | 0,10       | 0,79              |
| RS974819                         | 90,4%            | 0,32       | 0,40              |
| RS2759393                        | 94,5%            | 0,22       | 0,29              |
| RS3763197                        | 95,4%            | 0,16       | 0,20              |
| RS3857504                        | 93,3%            | 0,17       | 0,34              |
| RS5744478                        | 95,8%            | 0,08       | 0,24              |
| RS1626340                        | 91,5%            | 0,21       | 0,01              |
| RS1036095                        | 94,8%            | 0,25       | 0,97              |
| RS4522809                        | 94,7%            | 0,45       | 0,48              |
| RS4986790                        | 95,7%            | 0,07       | 0,82              |
| RS1800629                        | 95,0%            | 0,18       | 0,39              |
| RS361525                         | 95,0%            | 0,05       | 0,09              |
| RS11574027                       | 95,7%            | 0,02       | 0,26              |
| RS2238135                        | 94,2%            | 0,23       | 0,71              |
| RS4516035                        | 94,2%            | 0,43       | 0,01              |
| RS2010963                        | 94,8%            | 0,34       | 0,11              |
| RS3025039                        | 95,8%            | 0,13       | 0,60              |
| RS699947                         | 93,9%            | 0,48       | 0,15              |

MAF, minor allele frequency

HW p-value, Result of Hardy-Weinberg equilibrium analysis using chi-square analysis

**Supplementary Table S3, Interaction analysis of clinical factors and genetic factors on AVF failure**

| <b>Factor V Leiden</b> |                     | <b>HR with 95% CI</b> |             | <b>P</b> |
|------------------------|---------------------|-----------------------|-------------|----------|
| -                      | Male                | 1                     | Reference   |          |
| -                      | Female              | 1.61                  | (1.21-2.15) | 0,001    |
| +                      | Male                | 5.00                  | (2.60-9.61) | <0,001   |
| +                      | Female              | 1.06                  | (0.26-4.28) | 0,94     |
| <hr/>                  |                     |                       |             |          |
| -                      | Diabetes mellitus - | 1                     | Reference   |          |
| -                      | Diabetes mellitus + | 2.23                  | (1.59-3.13) | <0,001   |
| +                      | Diabetes mellitus - | 3.61                  | (1.95-6.68) | <0,001   |
| +                      | Diabetes mellitus + | 0.95                  | (0.13-6.82) | 0,96     |
| <hr/>                  |                     |                       |             |          |
| <b>LRP1 rs1466535</b>  |                     |                       |             |          |
| <b>GG/AG</b>           | Male                | 1                     | Reference   |          |
| <b>GG/AG</b>           | Female              | 1.58                  | (1.17-2.15) | 0,003    |
| <b>AA</b>              | Male                | 1.90                  | (1.15-3.15) | 0,012    |
| <b>AA</b>              | Female              | 1.69                  | (0.94-3.01) | 0,078    |
| <hr/>                  |                     |                       |             |          |
| <b>GG/AG</b>           | Diabetes mellitus - | 1                     | Reference   |          |
| <b>GG/AG</b>           | Diabetes mellitus + | 2.11                  | (1.48-3.01) | <0,001   |
| <b>AA</b>              | Diabetes mellitus - | 1.63                  | (1.07-2.47) | 0,022    |
| <b>AA</b>              | Diabetes mellitus + | 2.97                  | (1.10-8.05) | 0,032    |

HR, hazard ratio; CI, confidence interval; P, p-value
